# Supplementary material for: Development of an advanced multiwavelength emission detector for the analytical ultracentrifuge
Source: Nanoscale Adv. 2024 Feb 19;6(10):2611–22. doi: 10.1039/d3na00980g (PMC11093262; doi:10.1039/d3na00980g)
Supplement: NA-006-D3NA00980G-s001 [file NA-006-D3NA00980G-s001.pdf]

## Electronic Supplementary Information

### Development of an advanced multiwavelength emission detector for the analytical ultracentrifuge

Vanessa Lautenbach,<sup>a</sup> Georgy Onishchukov,<sup>a,b,c</sup> Simon Wawra,<sup>a,b,d</sup> Uwe Frank,<sup>a,b,e</sup> Lukas Hartmann,<sup>a</sup> Wolfgang Peukert,<sup>a,b</sup> Johannes Walter<sup>a,b</sup>

- <sup>a</sup>. Institute of Particle Technology (LFG), Friedrich-Alexander-Universität Erlangen-Nürnberg (FAU), Cauerstraße 4, 91058 Erlangen, Germany. E-mail: johannes.walter@fau.de  
<sup>b</sup>. Interdisciplinary Center for Functional Particle Systems (FPS), Friedrich-Alexander-Universität Erlangen-Nürnberg (FAU), Haberstraße 9a, 91058 Erlangen, Germany.  
<sup>c</sup>. Max Planck Institute for the Science of Light, Staudtstraße 2, 91058 Erlangen, Germany.  
<sup>d</sup>. Current affiliation: Boehringer Ingelheim Pharma GmbH & Co. KG, Innovation Unit, Analytical Development Biologicals, Birkendorfer Straße 65, 88400 Biberach an der Riß, Germany.  
<sup>e</sup>. Current affiliation: Carl Zeiss Vision GmbH, Turnstraße 27, 73430 Aalen, Germany.

### Hardware Modifications

**Table T1.** Components of the Gen2 MWE-AUC.

| Identifier                | Description                                                                                                                                       | Supplier          | Model                   |
|---------------------------|---------------------------------------------------------------------------------------------------------------------------------------------------|-------------------|-------------------------|
| <b>Optical components</b> |                                                                                                                                                   |                   |                         |
| M1                        | Ø1/2" 90° off-axis parabolic mirror, RFL = 15 mm, protected silver coating                                                                        | Thorlabs          | MPD00M9-P01             |
| M2                        | Ø1" 90° off-axis parabolic mirror, RFL = 6", protected silver coating                                                                             | Thorlabs          | MPD169-P01              |
| M3                        | Ø2" 90° off-axis parabolic mirror with Ø3 mm hole, RFL = 4", protected silver coating                                                             | Thorlabs          | MPD249H-P01             |
| M4                        | Ø3" 45° off-axis parabolic mirror, RFL = 6", protected silver coating                                                                             | Thorlabs          | MPD364-P01              |
| Spectral filter           | Ø1" longpass filter, 520 nm cut on, OD > 3 at 520 nm                                                                                              | Omega             | 525ALP                  |
| Spectral filter*          | Ø1" longpass filter, 410 nm cut on, OD > 6 at < 407nm, T <sub>avg</sub> > 93% for 412 - 918 nm                                                    | Semrock           | LP02-407RU-25           |
| Laser 520 nm              | Diode laser, 80 mW TEM00, center wavelength 520 nm, bandwidth ~1 nm, with temperature control and digital amplitude modulation                    | Integrated Optics | 0520L-11A-NI-NT-NF      |
| Laser 405 nm*             | Diode laser, 180 mW TEM00, center wavelength 405 nm, bandwidth ~1 nm, with temperature control and digital amplitude modulation                   | Integrated Optics | 0405L-11A-NI-NT-NF      |
| Spectral filter*          | Ø1/2" Nanopede 520/15 bandpass filter, 520 nm center, 20 nm bandwidth, T <sub>avg</sub> > 93% for 512.5 – 527.5 nm, OD > 5 in 536 – 900 nm region | Semrock           | FBP01-520/15-12.5       |
| Spectral filter*          | Ø1/2" Nanopede 400/16 bandpass filter, 400 nm center, 20nm bandwidth, T <sub>avg</sub> > 93% for 392 – 408 nm, OD > 5 for 415 – 900 nm            | Semrock           | FBP01-400/16-12.5       |
| Variable attenuator*      | Ø50 mm continuously variable neutral density disk filter, OD: 0.04 - 2.0, 350 - 700 nm antireflection coating                                     | Thorlabs          | NDC-50C-2-A with NDC-PM |

| <b>Mechanical components</b> (only these in the chamber) |                                                                                                                                                                                                    |                                |                      |
|----------------------------------------------------------|----------------------------------------------------------------------------------------------------------------------------------------------------------------------------------------------------|--------------------------------|----------------------|
| Fiber adapter                                            | Ø1/2" FC/APC fiber adapter plate                                                                                                                                                                   | Thorlabs                       | SM05FCA              |
| Fiber cage adapter                                       | 30 mm to 16 mm cage-system right-angle adapter                                                                                                                                                     | Thorlabs                       | SP30                 |
| M1 mount                                                 | Ø1" kinematic cage-compatible mount                                                                                                                                                                | Thorlabs                       | KC1/M                |
| M1 adapter                                               | Ø1" adapter for Ø1/2" off-axis parabolic mirrors                                                                                                                                                   | Thorlabs                       | MP127P1              |
| M2 mount                                                 | Right-angle kinematic Ø1" off-axis parabolic mirror mount for 30 mm cage system                                                                                                                    | Thorlabs                       | KCB1P/M              |
| M3 mount                                                 | Ø2" precision kinematic mirror mount                                                                                                                                                               | Thorlabs                       | KS2                  |
| Fiber mount                                              | Ø1" 5-axis kinematic mount                                                                                                                                                                         | Thorlabs                       | K5X1                 |
| Fiber adapter                                            | Ø1" FC/PC fiber adapter plate                                                                                                                                                                      | Thorlabs                       | SM1FC                |
| Cage rods                                                | Cage assembly rod                                                                                                                                                                                  | Thorlabs                       | ER6                  |
| Radial linear translation stage                          | TravelMax translation stage, 25 mm travel, crossed-roller bearings, 20 kg load                                                                                                                     | Thorlabs                       | LNR25M/M             |
| Linear actuator                                          | Low-vacuum linear step-motor actuator with built-in controller, 25 mm travel, 0.048 µm step size, 1 µm repeatability                                                                               | Zaber                          | T-NA-08A-24-SV2      |
| Vertical linear translation stage*                       | Low-vacuum vertical translation stage with step motor, 20 mm travel, 0.095 µm step size, 1 µm repeatability                                                                                        | Zaber                          | VSR20A-V1T4-MC03     |
| <b>Vacuum components</b>                                 |                                                                                                                                                                                                    |                                |                      |
| Fiber feedthrough                                        | Single-mode QS-488 fiber (3.5/125/900 µm) with adjustable FC/APC connectors and multi-mode QM-UVVIS fiber* (200/125/900 µm, NA 0.22) with FSMA905 connectors                                       | OZ Optics                      |                      |
| Step-motor cable feedthrough                             | 18 wires                                                                                                                                                                                           | Lemo                           | SWH.3S.318.CLLDV     |
| Light-barrier cable feedthrough                          | 4 wires                                                                                                                                                                                            | Lemo                           | EVP.0V.304.CLLSV     |
| <b>Electronic components</b>                             |                                                                                                                                                                                                    |                                |                      |
| Light barrier                                            | Reflective photosensor                                                                                                                                                                             |                                | RPR-220              |
| Control computer card                                    | Multifunctional analog/digital I/O card (3 counters are used)                                                                                                                                      | National Instruments           | PCIe-6321            |
| Controller for vertical translation stage*               | X-Series stepper motor controller                                                                                                                                                                  | Zaber                          | X-MCA-KX13AF         |
| Diffraction grating spectrograph*                        | High-performance imaging spectrograph with interchangeable triple grating turret, focal length 300mm, f/3,9 aperture ratio, 150 l/mm, 600 l/mm and 1800 l/mm gratings with 500 nm blaze wavelength | Teledyne Princeton Instruments | HRS-300MS-NI         |
| EMCCD camera*                                            | ProEM+: 16002 eXcelon3 back-illuminated EMCCD camera, 1600 X 200, 16 µm pixels, -75°C sensor cooling, 16 bit 8 MHz ADC                                                                             | Teledyne Princeton Instruments | PRO1600x200BX3       |
| CMOS camera*                                             | Monochrome camera with Sony IMX183 sensor, 1", 20.5MP, 2.2µm pixels                                                                                                                                | Matrix Vision                  | BF3-5M-0205ZG-112510 |

\* New components in the Gen2 MWE-AUC

## Hardware Specifications

**Table T2.** Specifications of the Gen2 MWE-AUC and comparison with the AU-FDS.

| Parameter / Option                 |                      | Gen2 MWE-AUC                                                       | AU-FDS                                            |
|------------------------------------|----------------------|--------------------------------------------------------------------|---------------------------------------------------|
| Sample volume <sup>1</sup> ,<br>μl | 1.5 mm double-sector | 50 <sup>1a</sup>                                                   |                                                   |
|                                    | 3 mm mono-sector     | 200                                                                |                                                   |
| Excitation laser, nm               |                      | 405 or 520, external <sup>2</sup>                                  | various options, built-in                         |
| Excitation power, mW               |                      | ≤ 20 <sup>3</sup>                                                  | various options                                   |
| Tuneability of spectral range      |                      | single grating, mid-focal length imaging spectrograph <sup>4</sup> | n.a., spectral filter                             |
| Spectral range, nm                 | grating 150 l/mm     | ~540, e.g., 400 – 937                                              | fixed, e.g., 505 - 565 for 488nm excitation laser |
|                                    | grating 600 l/mm     | ~130, e.g., 515 – 643                                              |                                                   |
|                                    | grating 1200 l/mm    | ~35, e.g., 525 – 558                                               |                                                   |
| Spectral resolution, nm            | grating 150 l/mm     | 2.0 <sup>5</sup>                                                   | n.a.                                              |
|                                    | grating 600 l/mm     | 0.5                                                                |                                                   |
|                                    | grating 1200 l/mm    | 0.14                                                               |                                                   |
| Detector                           |                      | scientific-grade EMCCD camera                                      | photomultiplier                                   |
| Signal dynamic range, logs         |                      | ~5<br>16 bit ADC & 1-2-4 gain <sup>6</sup>                         | ADC & tuneable PMT gain                           |

<sup>1</sup> Required volume for sedimentation velocity experiments to provide 85-90% cell filling with well visible meniscus. For sedimentation equilibrium using special centrepieces, required sample volume can be up to 4 times smaller.

<sup>1a</sup> Estimated reduction of the signal amplitude of a 1.5 mm compared to 3 mm centrepiece is ~ 20%.

<sup>2</sup> External laser can be easily exchanged by the operator. There are no limitations on the laser dimensions, power consumption, cooling, etc.

<sup>3</sup> Variable optical attenuator allows tuneable power reduction by two orders of magnitude without changing other parameters of the laser.

<sup>4</sup> External spectrograph, having no limitation on its size, provides a unique flexibility of spectral range and spectral resolution by using different gratings (three on a turret with easy exchange of turrets by the operator). The central wavelength is quickly tuneable also during measurements by changing the grating angle using computer control, as well as the range by changing the grating used. In addition to the EMCCD camera, a second, e.g., NIR or UV-optimized camera, photomultiplier or any other detector can be installed on the second spectrograph output with computer control of the output used.

<sup>5</sup> Resolution can be improved by postprocessing of the 2D camera image, as well as by reducing the tuneable entrance slit with corresponding reduction of the signal amplitude.

<sup>6</sup> Without electron multiplication (EM). The dynamic range can be further increased by integration over several camera pixels. EM gain up to x1000 allows single photon counting.

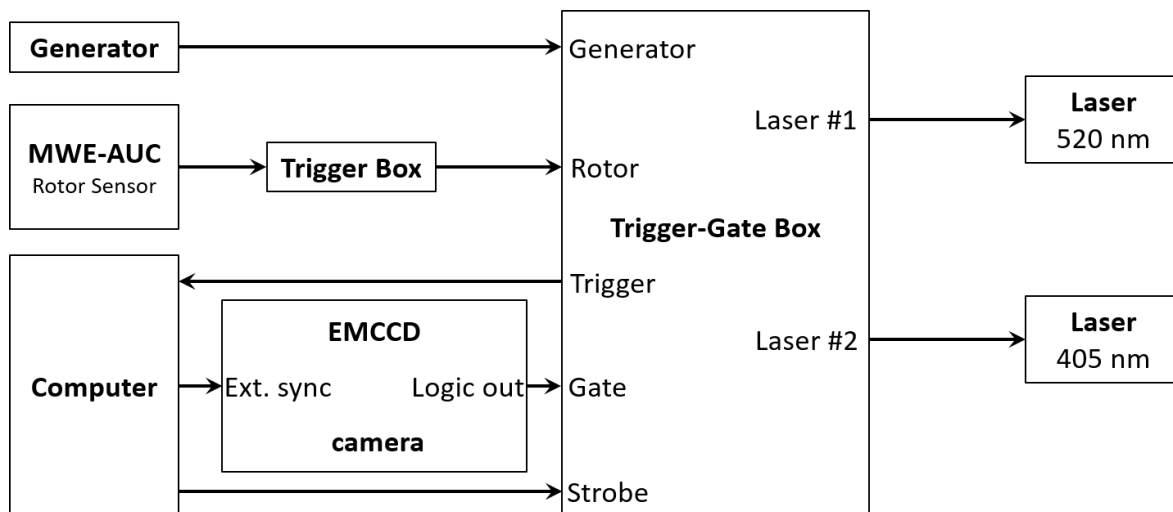

**Figure S1.** Block scheme of the triggering.

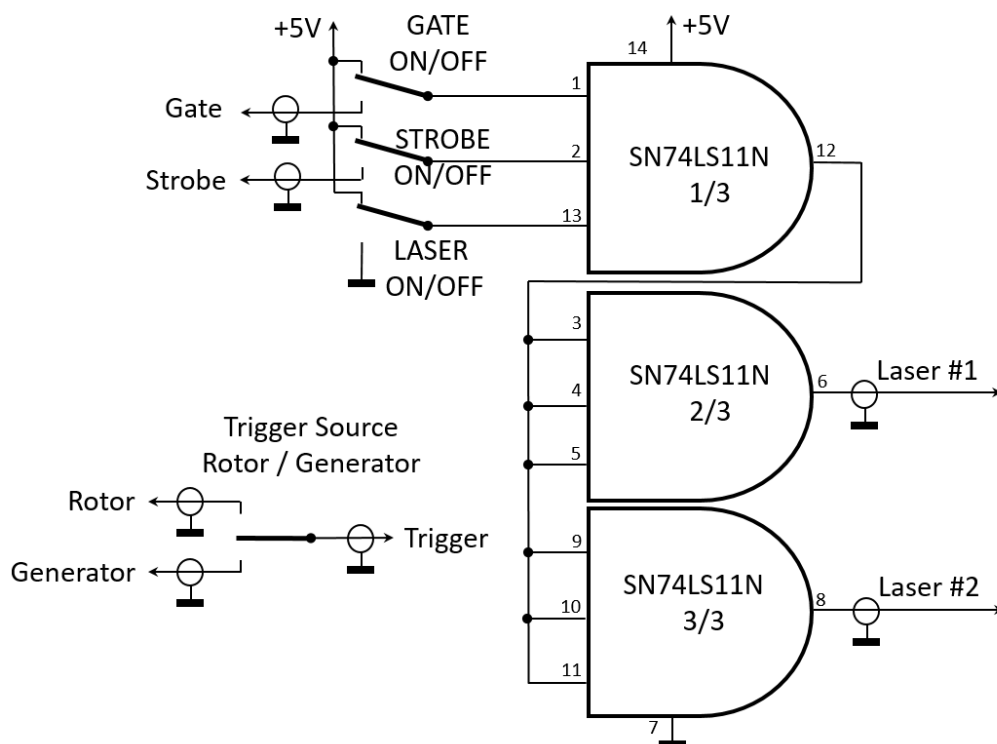

**Figure S2.** Electrical scheme of trigger-gating box.

## Supplementary data

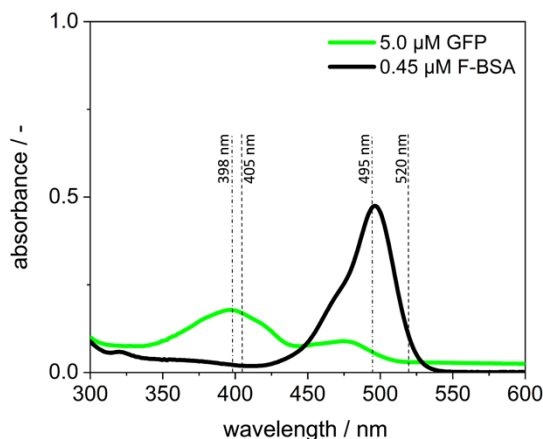

**Figure S3.** Absorbance spectra of GFP and F-BSA measured prior to AUC measurements with a Varian Cary 100 spectrophotometer (2.0 nm slit width, 10 mm optical path, 1.0 nm spectral resolution). The respective absorption maxima are at 398 nm and 495 nm for GFP and F-BSA, respectively. Dashed lines mark the 398 nm and 495 nm used for the absorbance detection in the Optima AUC as well as the 405 nm and 520 nm excitation laser lines used in the Gen2 MWE-AUC.

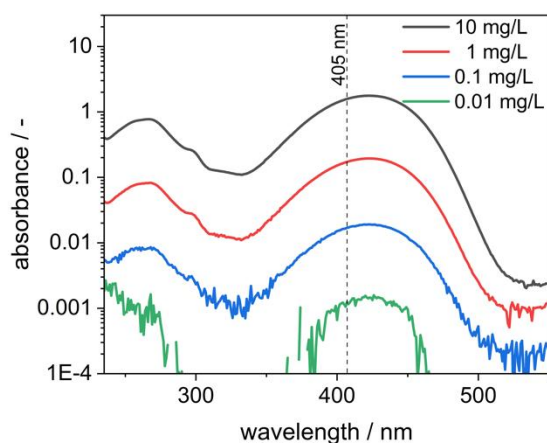

**Figure S4.** Absorbance spectra for different concentrations of Coumarin 153 measured prior to AUC measurements with a Varian Cary 100 spectrophotometer (2.0 nm slit width, 10 mm optical path, 1 nm spectral resolution). Dashed line marks the 405 nm excitation laser line.

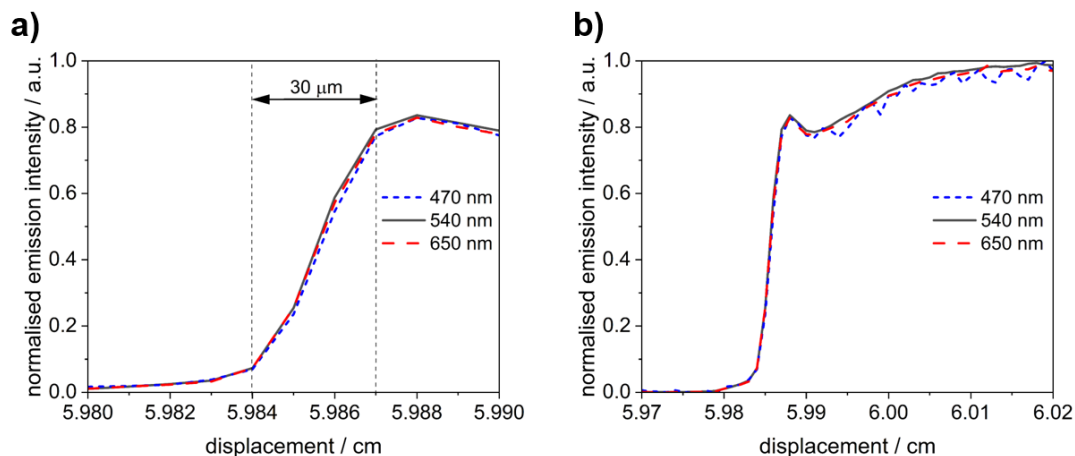

**Figure S5.** Radial scan of 0.1 mg/L Coumarin 153 dissolved in ethanol showing the meniscus for various wavelengths. Data are recorded with 10  $\mu$ m steps at 5,000 rpm. The 405 nm laser was used for excitation, which provides a focal spot smaller than the 520 nm laser. a) Radial resolution of 30  $\mu$ m as the distance of the edge rise from the 10 % to the 90 % level. b) Distortions of the sedimentation profile in the meniscus region.

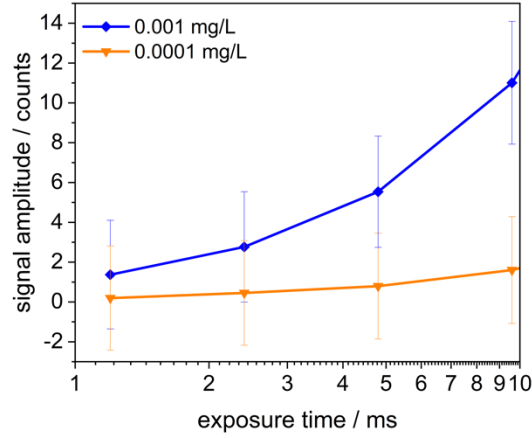

**Figure S6.** Signal amplitude of Coumarin 153 samples diluted in ethanol to target concentrations of 0.001 mg/L and 0.0001 mg/L measured at different exposure times to illustrate the linearity of the Gen2 MWE-AUC. Other than in Figure 4a) in the main manuscript, the linear y-axis allows a proper visualisation of error bars for very low signal amplitudes.

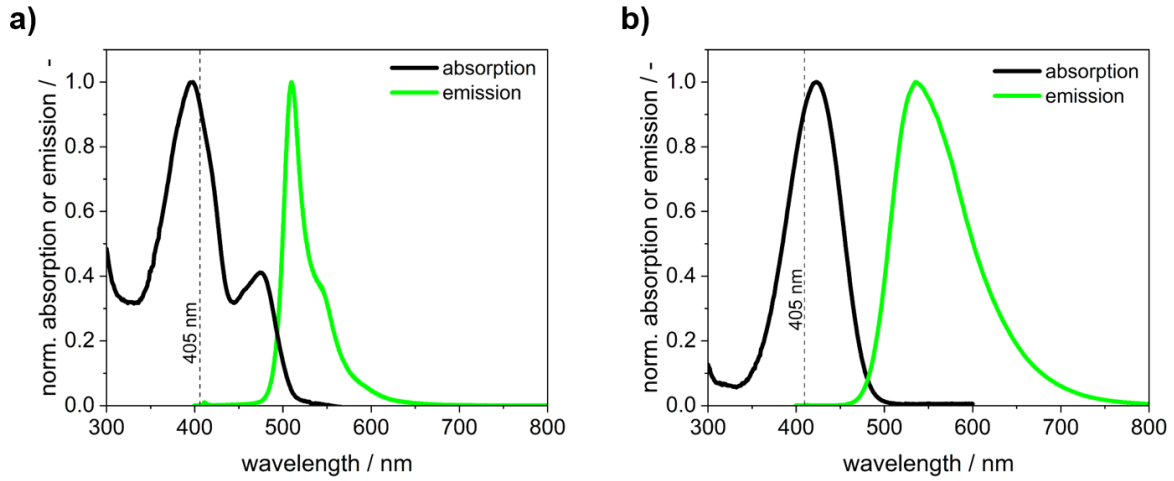

**Figure S7.** a) Normalised absorption and emission spectra of GFP diluted in a 20 v% glycerol/PBS buffer. Absorption and emission are shown for GFP concentrations of 5  $\mu$ M and 2.5  $\mu$ M, respectively. b) Normalised absorption and emission spectra for 1 mg/L Coumarin 153 dissolved in ethanol. Absorption spectra were measured with Varian Cary 100 spectrophotometer (2.0 nm slit width, 10 mm optical path, 1 nm spectral resolution). Dashed lines mark the 405 nm excitation laser line.

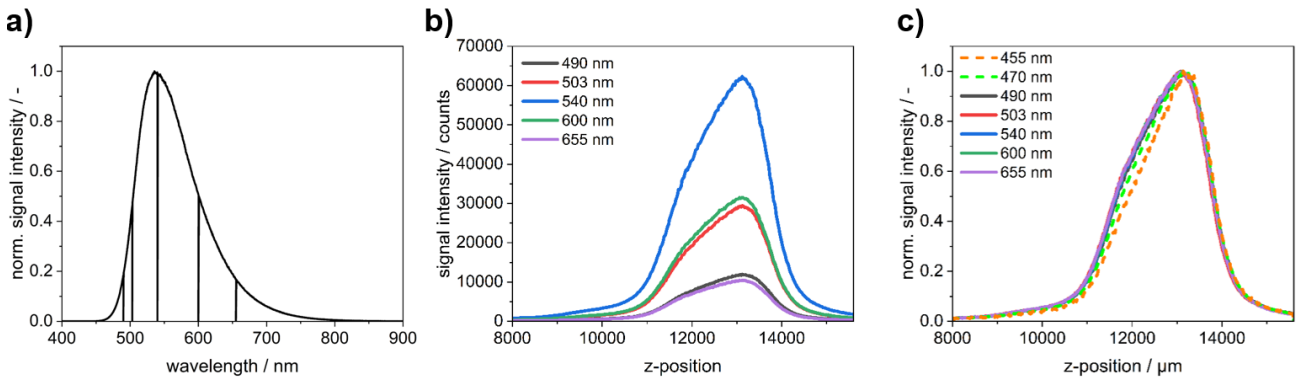

**Figure S8.** a) Emission spectrum of 10 mg/L Coumarin 153 dissolved in ethanol recorded at z-position 12,500  $\mu$ m. Straight lines indicate the selected wavelengths plotted in b) and c). b) Z-scans for the wavelengths shown in a) demonstrating distortions by the inner filter effects. c) Normalised z-scans of Coumarin 153 at several wavelengths, demonstrating the wavelength independence of the Gen2 MWE-AUC. The asymmetry visualises the apparent inner filter effects. Dashed lines show the z-scans for 455 nm and 470 nm demonstrating additionally the weak but still apparent secondary inner filter effect.

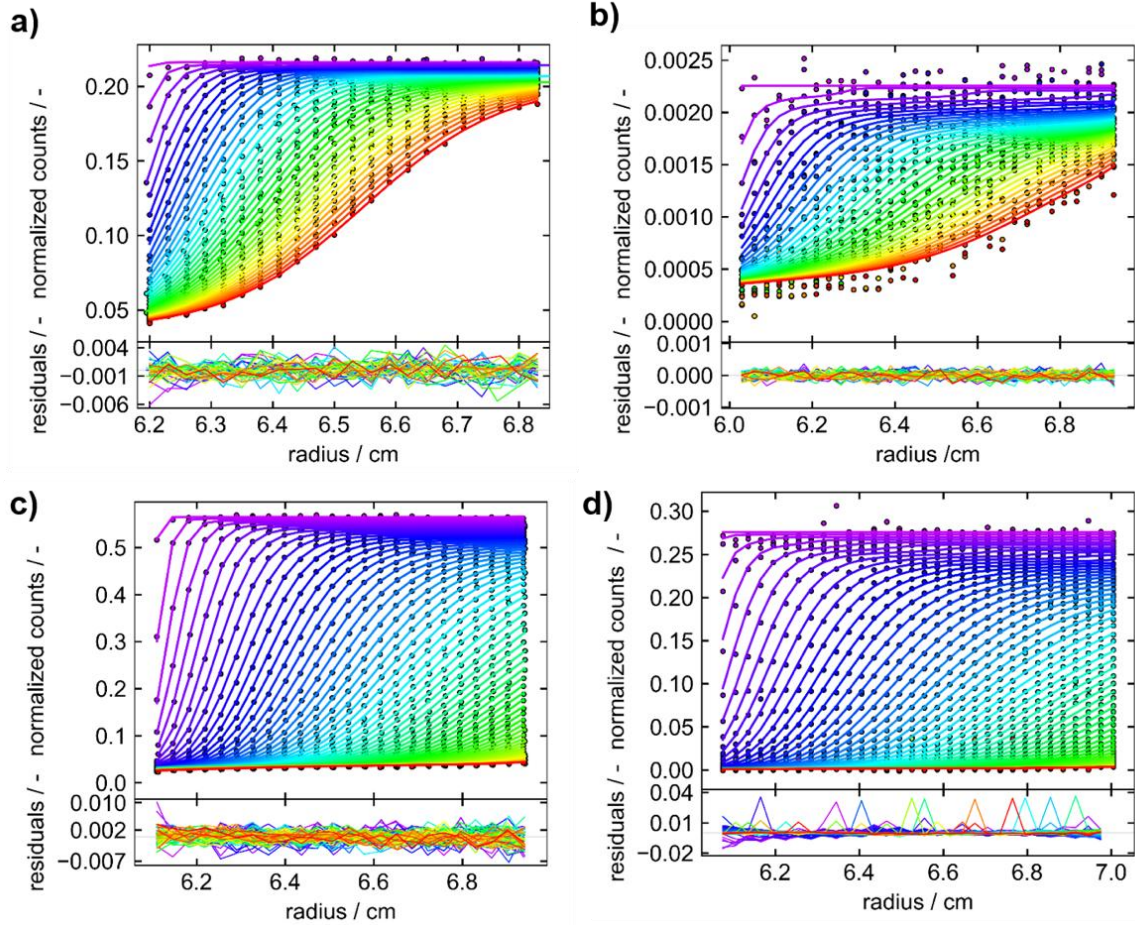

**Figure S9.** Fit results and residuals for GFP (a, b) and F-BSA (c, d) measured with the Optima AUC with the absorption detection system (a, c) and Gen2 MWE-AUC (b, d). The first 350 scans were considered for evaluation. The 520 nm laser was used for excitation in the MWE-AUC measurements. GFP was diluted in a glycerol/PBS buffer and was measured at 5  $\mu$ M in the Optima AUC and 2.5  $\mu$ M in the MWE-AUC (data shown are for emission at 570 nm). The comparably slow sedimentation of GFP can be explained by the presence of glycerol in the sample, whose density and viscosity are increased compared to water. F-BSA was diluted in a Tris (12 mM)/NaCl (15 mM) buffer and was measured at 0.45  $\mu$ M in both devices. F-BSA data by the MWE-AUC were evaluated at 550 nm. Note: Noise spikes observable in d) are due to “cosmic rays” being recorded by the EMCCD camera. Such environmental pollution only occurs sporadically and can be corrected for during data processing. Here the data were not post-treated and are plotted as recorded. All protein measurements were carried out at 40,000 rpm and 20°C.

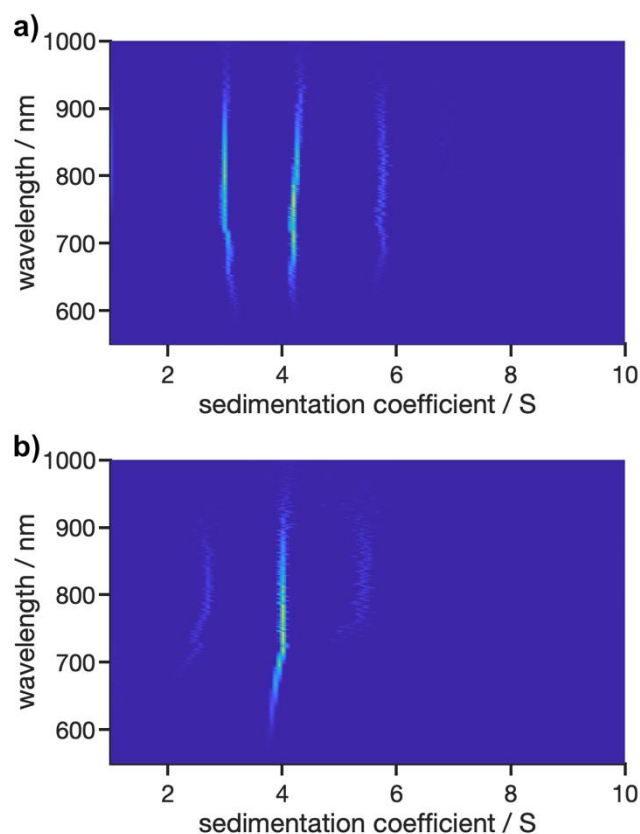

**Figure S10.** 2D analysis of sedimentation velocity experiments of AuNCs performed at 40,000 rpm, 20°C and an excitation at a) 405 nm and b) 520 nm. Data were integrated over 1.5 nm spectral bandwidth. For a) a partial specific volume of 0.65 cm<sup>3</sup>/g and frictional ratio of 1.4 was used for fitting the data instead of the best-fit values (0.547 cm<sup>3</sup>/g and 1.0, respectively) used for deriving the distributions shown in Figure 9a in the main manuscript. Both values were chosen manually in such way that the wavelength shift for each species is as small as possible. For b) the best-fit values for the partial specific volume (0.63 cm<sup>3</sup>/g) and frictional ratio (1.0) were used as no pronounced wavelength shift was observed, which is identical to the results reported in Figure 9b in the main manuscript. Both figures shown here display the non-regularised distributions.

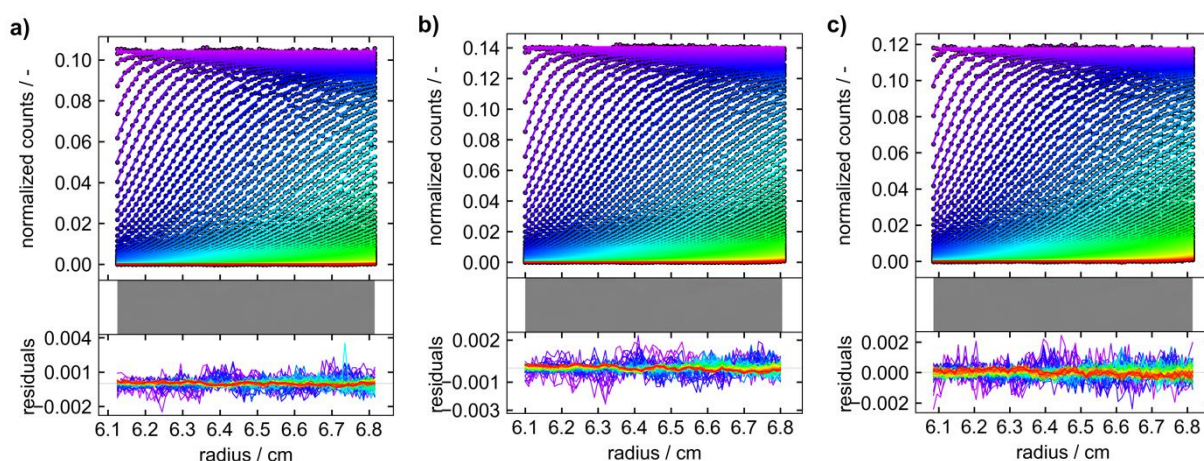

**Figure S11.** Fit results for sedimentation profiles and residuals of global analysis of AuNCs in SEDPHAT at wavelengths of a) 700 nm with bandwidth 5 nm, b) 760 nm with bandwidth 10 nm, and c) 825 nm with bandwidth 5 nm. The excitation was at 405 nm. Sedimentation coefficients of 3.35 S, 3.97 S and 4.82 S were obtained.
